# Supplementary material for: MaGIC: a machine learning tool set and web application for monoallelic gene inference from chromatin
Source: PubMed Central journal article supplement (PMC6394031; doi:10.1186/s12859-019-2679-7), 2019-02-28
Supplement: 12859_2019_2679_MOESM1_ESM.pdf [file 12859_2019_2679_MOESM1_ESM.pdf]

**Table S1.** Models' performances evaluated on an additional human dataset, with MAE and BAE genes identified in monoclonal cell lines derived from GM12878 (Nag et al., 2013, Dataset S2).

| <b>Model</b>      | <b>Recall<br/>(Sensitivity)</b> | <b>Specificity</b> | <b>Precision<br/>(PPV)</b> | <b>NPV</b> | <b>F1</b> | <b>Accuracy</b> | <b>Balanced<br/>Accuracy</b> |
|-------------------|---------------------------------|--------------------|----------------------------|------------|-----------|-----------------|------------------------------|
| <b>ada</b>        | 0.419                           | 0.967              | 0.741                      | 0.881      | 0.535     | 0.867           | 0.693                        |
| <b>glmStepAIC</b> | 0.379                           | 0.982              | 0.828                      | 0.876      | 0.52      | 0.872           | 0.681                        |
| <b>svmPoly</b>    | 0.435                           | 0.968              | 0.753                      | 0.884      | 0.551     | 0.87            | 0.701                        |
| <b>nnet</b>       | 0.415                           | 0.972              | 0.766                      | 0.881      | 0.538     | 0.87            | 0.693                        |
| <b>mlpML</b>      | 0.443                           | 0.959              | 0.709                      | 0.885      | 0.545     | 0.864           | 0.701                        |
| <b>rf</b>         | 0.395                           | 0.96               | 0.69                       | 0.876      | 0.503     | 0.857           | 0.678                        |
| <b>rpart</b>      | 0.423                           | 0.955              | 0.677                      | 0.881      | 0.521     | 0.857           | 0.689                        |
| <b>knn</b>        | 0.379                           | 0.97               | 0.738                      | 0.874      | 0.501     | 0.862           | 0.675                        |
| <b>evtree</b>     | 0.423                           | 0.955              | 0.677                      | 0.881      | 0.521     | 0.857           | 0.689                        |
