# Supplementary material for: MaGIC: a machine learning tool set and web application for monoallelic gene inference from chromatin
Source: PubMed Central journal article supplement (PMC6394031; doi:10.1186/s12859-019-2679-7), 2019-02-28
Supplement: 12859_2019_2679_MOESM2_ESM.pdf [file 12859_2019_2679_MOESM2_ESM.pdf]

**Table S2.** The generalized linear model performance evaluated on mouse B-lymphoid clonal cell lines (B-lymph), mouse embryonic fibroblasts (MEF) and mouse neural progenitor cells (NPC).

| Cells          | Recall<br>(sensitivity) | Specificity | Precision<br>(PPV) | NPV   | Accuracy | Balanced<br>Accuracy |
|----------------|-------------------------|-------------|--------------------|-------|----------|----------------------|
| <b>B-lymph</b> | 0.094                   | 0.961       | 0.564              | 0.665 | 0.659    | 0.527                |
| MEF            | 0.084                   | 0.981       | 0.65               | 0.721 | 0.718    | 0.533                |
| NPC            | 0.453                   | 0.898       | 0.586              | 0.837 | 0.79     | 0.675                |
